# Supplementary material for: Unveiling Alternative Oxidation Pathways and Antioxidant and Cardioprotective Potential of Amaranthin-Type Betacyanins from Spinach-like Atriplex hortensis var. ‘Rubra’
Source: PubMed Central journal article supplement (PMC10591473; doi:10.1021/acs.jafc.3c03044), 2023-10-04
Supplement: jf3c03044_si_001.pdf [file jf3c03044_si_001.pdf]

## Supporting information

1  
2  
3  
4  
5  
6  
7  
8  
9  
10  
11  
12  
13  
14  
15  
16  
17  
18  
19  
20  
21  
22  
23  
24

Unveiling Alternative Oxidation Pathways and Antioxidant and Cardioprotective Potential of Amaranthin-Type Betacyanins from Spinach-like *Atriplex hortensis* var. '*Rubra*'

Agnieszka Kumorkiewicz-Jamro<sup>a,b,c\*</sup>, Renata Górską<sup>a</sup>, Małgorzata Krok-Borkowicz<sup>d</sup>, Przemysław Mielczarek<sup>e,f</sup>, Łukasz Popenda<sup>g</sup>, Kateryna Lystvan<sup>h</sup>, Elżbieta Pamuła<sup>d</sup>, Sławomir Wybraniec<sup>a</sup>

<sup>a</sup> Department of Chemical Technology and Environmental Analysis, Faculty of Chemical Engineering and Technology, Cracow University of Technology, Warszawska 24, 31-155 Cracow, Poland

<sup>b</sup> South Australian Health and Medical Research Institute, Adelaide 5000 SA, Australia

<sup>c</sup> Faculty of Health and Medical Sciences, University of Adelaide, Adelaide 5005 SA, Australia

<sup>d</sup> Department of Biomaterials and Composites, Faculty of Materials Science and Ceramics, AGH University of Science and Technology, Al. Mickiewicza 30, 30-059 Cracow, Poland

<sup>e</sup> Department of Analytical Chemistry and Biochemistry, Faculty of Materials Science and Ceramics, AGH University of Science and Technology, Al. Mickiewicza 30, 30059, Cracow, Poland

<sup>f</sup> Laboratory of Proteomics and Mass Spectrometry, Maj Institute of Pharmacology, Polish Academy of Sciences, Smętna 12, 31-343 Cracow, Poland

<sup>g</sup> NanoBioMedical Centre, Adam Mickiewicz University, Wszechnicy Piastowskiej 3, 61-614 Poznań, Poland

<sup>h</sup> Department of Genetic Engineering, Institute of Cell Biology and Genetic Engineering of National Academy of Sciences of Ukraine (NASU), Akademika Zabolotnoho, 148, 03143, Kyiv, Ukraine

25 \* Corresponding author:  
26 Agnieszka Kumorkiewicz-Jamro  
27 agnieszka.kumorkiewicz-jamro@pk.edu.pl  
28 ORCID: 0000-0002-3828-3128  
29

30

## Results

31 **Mass spectrometric chromatograms** depicting the main products of the oxidation of  
32 purified celosianin by 1 mM ABTS radicals. The reaction was carried out in the presence of an  
33 acetate buffer at pH 3. Chromatograms were registered after 5, 20, 40, 60, and 80 min of  
34 reaction time. Chromatographic separation was conducted using a 150 mm x 4.6 mm, 5.0  $\mu$ m  
35 Kinetex C<sub>18</sub> column (Phenomenex, Torrance, CA, USA). The mobile phase was composed on  
36 2% aqueous formic acid (eluent A) and methanol (eluent B), with a gradient elution as follows:  
37 (t [min], %B), (0, 10), (12, 40), (15, 80). Data were recorded in positive ion polarity using  
38 selected ion monitoring (SIM). The chemical structures of oxidized celosianins, namely: 17-  
39 decarboxy-neocelosianin ( $m/z$  857) and 2,17-bidecarboxyxanneocelosianin ( $m/z$  811), were  
40 confirmed through LC-Q-Orbitrap-MS (Table S1) and NMR analyses (Figures S2-S7).

41

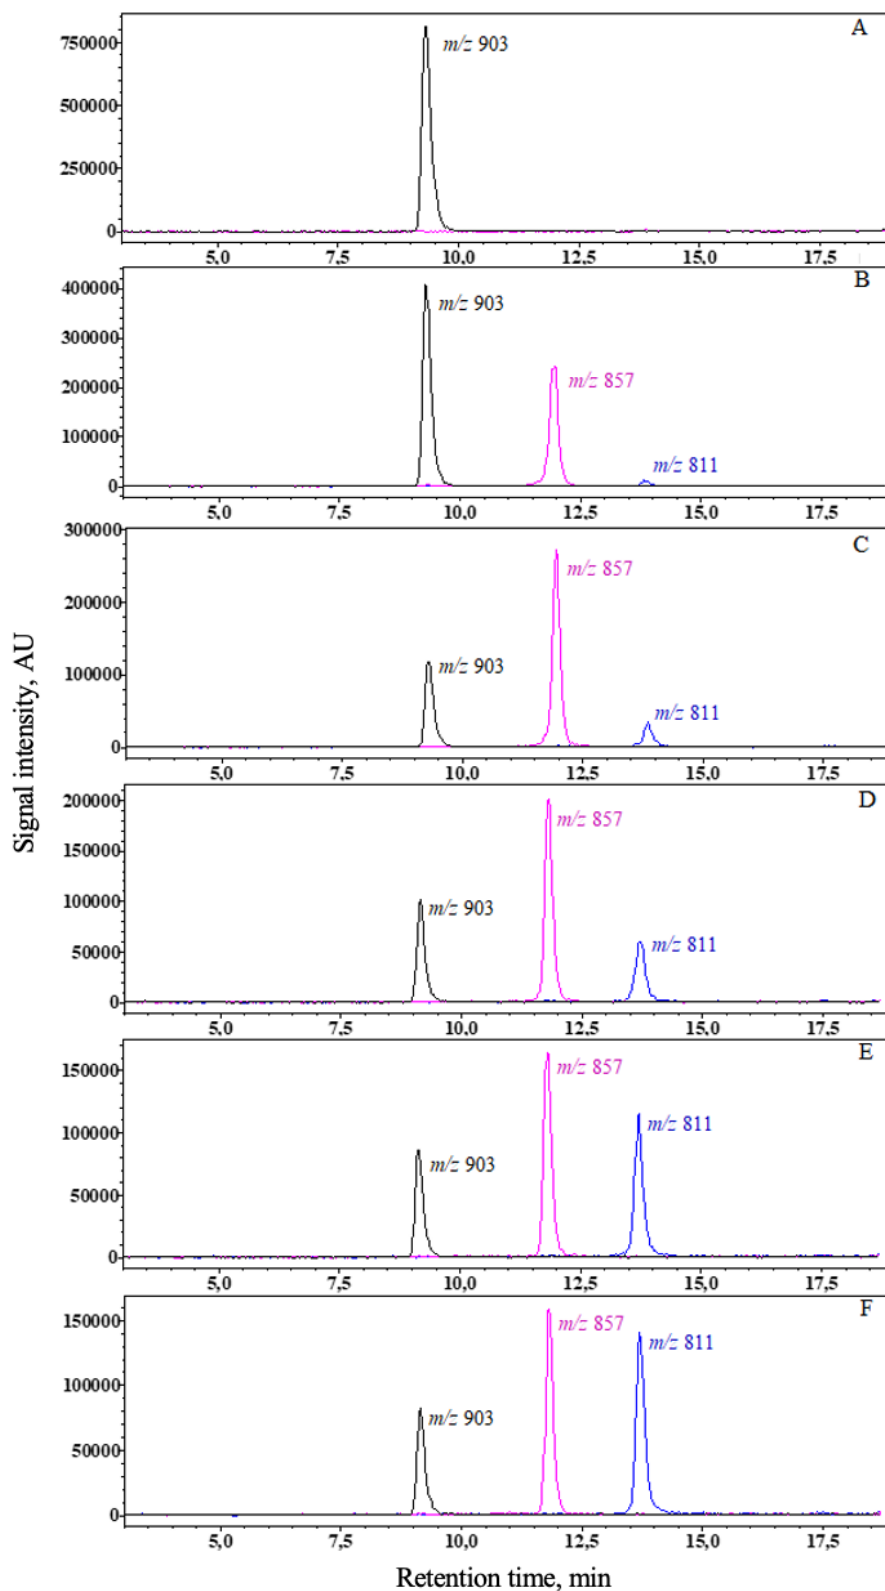

42

43 Figure S1 LC-MS chromatograms in SIM mode of celosianin (A) and the main products formed  
 44 during celosianin oxidation by ABTS radicals at pH 3 registered after 5 (B); 20 (C); 40 (D); 60  
 45 (E); and 80 (F) min of reaction.

46 **High-resolution mass spectrometric (HRMS) data obtained using LC-Q-**  
 47 **Orbitrap-MS**

48 The molecular formulas and the fragmentation patterns of the oxidation products of amaranthin,  
 49 argentinin, and celosianin were determined through HRMS analyses using the product ion  
 50 mode, where targeted precursors were isolated and fragmented in the HCD cell. The  
 51 fragmentation ions ( $MS^2$ ) were analyzed in the Orbitrap analyzer of the Orbitrap Exploris<sup>TM</sup>  
 52 240 Mass Spectrometer. Based on the obtained results and the elucidation of chemical structures  
 53 by NMR, a possible mechanism for the oxidation of amaranthin-type betacyanins was proposed.

54  
 55 Table S1 High-resolution mass spectrometric data obtained using LC-Q-Orbitrap-MS system  
 56 for oxidized betacyanins as well as for their fragmentation ions.

| Pigments and fragmentation ions <sup>a</sup>        | [M+H] <sup>+</sup> molecular formula                           | [M+H] <sup>+</sup> observed | [M+H] <sup>+</sup> predicted | Error [mDa] | Error [ppm] |
|-----------------------------------------------------|----------------------------------------------------------------|-----------------------------|------------------------------|-------------|-------------|
| <i>Amaranthin oxidation</i>                         |                                                                |                             |                              |             |             |
| 2,3-dihydroxy-2-decarboxy-xanamaranthin<br><b>1</b> | C <sub>29</sub> H <sub>35</sub> N <sub>2</sub> O <sub>19</sub> | 715.1831                    | 715.1829                     | 0.2         | 0.28        |
| nl: - Gluc                                          | C <sub>23</sub> H <sub>27</sub> N <sub>2</sub> O <sub>13</sub> | 539.1512                    | 539.1508                     | 0.4         | 0.74        |
| nl: - Gluc/Glc                                      | C <sub>17</sub> H <sub>17</sub> N <sub>2</sub> O <sub>8</sub>  | 377.0978                    | 377.0979                     | -0.1        | -0.27       |
| nl: - H <sub>2</sub> O/Gluc/Glc                     | C <sub>17</sub> H <sub>15</sub> N <sub>2</sub> O <sub>7</sub>  | 359.0877                    | 359.0874                     | 0.3         | 0.84        |
| amaranthin <b>2</b>                                 | C <sub>30</sub> H <sub>35</sub> N <sub>2</sub> O <sub>19</sub> | 727.1830                    | 727.1829                     | 0.1         | 0.14        |
| nl: -Gluc                                           | C <sub>24</sub> H <sub>27</sub> N <sub>2</sub> O <sub>13</sub> | 551.1517                    | 551.1508                     | 0.9         | 1.63        |
| nl: -Gluc/Glc                                       | C <sub>18</sub> H <sub>17</sub> N <sub>2</sub> O <sub>8</sub>  | 389.0981                    | 389.0979                     | 0.2         | 0.51        |
| nl: -Gluc/Glc/ CO <sub>2</sub> /2H                  | C <sub>17</sub> H <sub>15</sub> N <sub>2</sub> O <sub>6</sub>  | 343.0926                    | 343.0925                     | 0.1         | 0.29        |
| nl: -Gluc/Glc/ 2CO <sub>2</sub> /4H                 | C <sub>16</sub> H <sub>13</sub> N <sub>2</sub> O <sub>4</sub>  | 297.0872                    | 297.0870                     | 0.2         | 0.67        |
| nl: -Gluc/Glc/ 3CO <sub>2</sub> /2H                 | C <sub>15</sub> H <sub>15</sub> N <sub>2</sub> O <sub>2</sub>  | 255.1127                    | 255.1128                     | -0.1        | -0.39       |
| 2-decarboxy-xanamaranthin <b>3</b>                  | C <sub>29</sub> H <sub>33</sub> N <sub>2</sub> O <sub>17</sub> | 681.1771                    | 681.1774                     | -0.3        | -0.44       |
| nl: -Gluc                                           | C <sub>23</sub> H <sub>25</sub> N <sub>2</sub> O <sub>11</sub> | 505.1452                    | 505.1453                     | -0.1        | -0.20       |
| nl: -Gluc/CO <sub>2</sub> /2H                       | C <sub>22</sub> H <sub>23</sub> N <sub>2</sub> O <sub>9</sub>  | 459.1395                    | 459.1398                     | -0.3        | -0.65       |
| nl: -Gluc/Glc                                       | C <sub>17</sub> H <sub>15</sub> N <sub>2</sub> O <sub>6</sub>  | 343.0923                    | 343.0925                     | -0.2        | -0.58       |
| nl: -Gluc/Glc/CO <sub>2</sub> /2H                   | C <sub>16</sub> H <sub>13</sub> N <sub>2</sub> O <sub>4</sub>  | 297.0869                    | 297.0870                     | -0.1        | -0.34       |
| nl: -Gluc/Glc/2CO <sub>2</sub>                      | C <sub>15</sub> H <sub>15</sub> N <sub>2</sub> O <sub>2</sub>  | 255.1125                    | 255.1128                     | -0.3        | -1.18       |
| 2,17-bidecarboxy-xanamaranthin <b>4</b>             | C <sub>28</sub> H <sub>33</sub> N <sub>2</sub> O <sub>15</sub> | 637.1876                    | 637.1876                     | 0.0         | 0.00        |
| nl: -Gluc                                           | C <sub>22</sub> H <sub>25</sub> N <sub>2</sub> O <sub>9</sub>  | 461.1557                    | 461.1555                     | 0.2         | 0.43        |
| nl: -Gluc/CO <sub>2</sub>                           | C <sub>21</sub> H <sub>25</sub> N <sub>2</sub> O <sub>7</sub>  | 417.1653                    | 417.1656                     | -0.3        | -0.72       |
| nl: -Gluc/Glc                                       | C <sub>16</sub> H <sub>15</sub> N <sub>2</sub> O <sub>4</sub>  | 299.1027                    | 299.1026                     | 0.1         | 0.33        |
| nl: -Gluc/Glc/CO <sub>2</sub> /2H                   | C <sub>15</sub> H <sub>13</sub> N <sub>2</sub> O <sub>2</sub>  | 253.0972                    | 253.0972                     | 0.0         | 0.00        |
| 17-decarboxy-neoamaranthin <b>5</b>                 | C <sub>29</sub> H <sub>33</sub> N <sub>2</sub> O <sub>17</sub> | 681.1772                    | 681.1774                     | -0.2        | -0.29       |
| nl: -Gluc                                           | C <sub>23</sub> H <sub>25</sub> N <sub>2</sub> O <sub>11</sub> | 505.1451                    | 505.1453                     | -0.2        | -0.40       |

|                                                   |                                                                |          |          |      |       |
|---------------------------------------------------|----------------------------------------------------------------|----------|----------|------|-------|
| nl: -Gluc/CO <sub>2</sub> /2H                     | C <sub>22</sub> H <sub>23</sub> N <sub>2</sub> O <sub>9</sub>  | 459.1392 | 459.1398 | -0.6 | -1.31 |
| nl: -Gluc/Glc                                     | C <sub>17</sub> H <sub>15</sub> N <sub>2</sub> O <sub>6</sub>  | 343.0921 | 343.0925 | -0.4 | -1.17 |
| nl: -Gluc/Glc/CO <sub>2</sub> /2H                 | C <sub>16</sub> H <sub>13</sub> N <sub>2</sub> O <sub>4</sub>  | 297.0867 | 297.0870 | -0.3 | -1.01 |
| nl: -Gluc/Glc/2CO <sub>2</sub>                    | C <sub>15</sub> H <sub>15</sub> N <sub>2</sub> O <sub>2</sub>  | 255.1124 | 255.1128 | -0.4 | -1.57 |
| <b>2,17-bidecarboxy-xanneoamaranthin 6</b>        | C <sub>28</sub> H <sub>31</sub> N <sub>2</sub> O <sub>15</sub> | 635.1719 | 635.1719 | 0.0  | 0.00  |
| nl: -Gluc                                         | C <sub>22</sub> H <sub>23</sub> N <sub>2</sub> O <sub>9</sub>  | 459.1403 | 459.1398 | 0.5  | 1.09  |
| nl: -Gluc/Glc                                     | C <sub>16</sub> H <sub>13</sub> N <sub>2</sub> O <sub>4</sub>  | 297.0871 | 297.0870 | 0.1  | 0.34  |
| <b>2,17-decarboxy-neoamaranthin 7</b>             | C <sub>28</sub> H <sub>33</sub> N <sub>2</sub> O <sub>15</sub> | 637.1879 | 637.1875 | 0.4  | 0.63  |
| nl: -Gluc                                         | C <sub>22</sub> H <sub>25</sub> N <sub>2</sub> O <sub>9</sub>  | 461.1556 | 461.1555 | 0.1  | 0.22  |
| nl: -Gluc/Glc                                     | C <sub>16</sub> H <sub>15</sub> N <sub>2</sub> O <sub>4</sub>  | 299.1027 | 299.1026 | 0.1  | 0.33  |
| nl: -Gluc/Glc/CO <sub>2</sub>                     | C <sub>15</sub> H <sub>15</sub> N <sub>2</sub> O <sub>2</sub>  | 255.1127 | 255.1128 | -0.1 | -0.39 |
| nl: -Gluc/Glc/CO <sub>2</sub> /2H                 | C <sub>15</sub> H <sub>13</sub> N <sub>2</sub> O <sub>2</sub>  | 253.0972 | 253.0971 | 0.1  | 0.40  |
| <b>2-decarboxy-xanneoamaranthin 8</b>             | C <sub>29</sub> H <sub>31</sub> N <sub>2</sub> O <sub>17</sub> | 679.1619 | 679.1617 | 0.2  | 0.29  |
| nl: -Gluc                                         | C <sub>23</sub> H <sub>23</sub> N <sub>2</sub> O <sub>11</sub> | 503.1297 | 503.1296 | 0.1  | 0.20  |
| nl: - Gluc/Glc                                    | C <sub>17</sub> H <sub>13</sub> N <sub>2</sub> O <sub>6</sub>  | 341.0769 | 341.0786 | -1.7 | -4.98 |
| nl: - Gluc/Glc/2CO <sub>2</sub>                   | C <sub>15</sub> H <sub>13</sub> N <sub>2</sub> O <sub>2</sub>  | 253.0978 | 253.0972 | 0.6  | 2.37  |
| <i>Argentinian oxidation</i>                      |                                                                |          |          |      |       |
| <b>argentianin 10</b>                             | C <sub>39</sub> H <sub>41</sub> N <sub>2</sub> O <sub>21</sub> | 873.2198 | 873.2196 | 0.2  | 0.23  |
| nl: -Coum/Gluc                                    | C <sub>24</sub> H <sub>27</sub> N <sub>2</sub> O <sub>13</sub> | 551.1509 | 551.1508 | 0.1  | 0.24  |
| nl: -Coum/Gluc/Glc                                | C <sub>18</sub> H <sub>17</sub> N <sub>2</sub> O <sub>8</sub>  | 389.0981 | 389.0979 | 0.2  | 0.41  |
| nl: -Coum/Gluc/Glc/ CO <sub>2</sub> /2H           | C <sub>17</sub> H <sub>15</sub> N <sub>2</sub> O <sub>6</sub>  | 343.0928 | 343.0925 | 0.3  | 0.99  |
| nl: -Coum/Gluc/Glc/ 2CO <sub>2</sub> /4H          | C <sub>16</sub> H <sub>13</sub> N <sub>2</sub> O <sub>4</sub>  | 297.0872 | 297.0870 | 0.2  | 0.74  |
| nl: -Coum/Gluc/Glc/ 3CO <sub>2</sub> /2H          | C <sub>15</sub> H <sub>15</sub> N <sub>2</sub> O <sub>2</sub>  | 255.1131 | 255.1128 | 0.3  | 1.18  |
| <b>2,3-dihydroxy-2-decarboxy-xanargentianin 9</b> | C <sub>38</sub> H <sub>41</sub> N <sub>2</sub> O <sub>21</sub> | 861.2198 | 861.2196 | 0.2  | 0.23  |
| nl: - Coum/Gluc                                   | C <sub>23</sub> H <sub>27</sub> N <sub>2</sub> O <sub>13</sub> | 539.1512 | 539.1508 | 0.4  | 0.74  |
| nl: - Coum/Gluc/Glc                               | C <sub>17</sub> H <sub>17</sub> N <sub>2</sub> O <sub>8</sub>  | 377.0977 | 377.0979 | -0.2 | -0.53 |
| nl: - H <sub>2</sub> O/Coum/Gluc/Glc              | C <sub>17</sub> H <sub>15</sub> N <sub>2</sub> O <sub>7</sub>  | 359.0872 | 359.0874 | -0.2 | -0.56 |
| <b>17-decarboxy-neoargentianin 11</b>             | C <sub>38</sub> H <sub>39</sub> N <sub>2</sub> O <sub>19</sub> | 827.2122 | 827.2142 | -2.0 | -2.42 |
| nl: -Coum                                         | C <sub>29</sub> H <sub>33</sub> N <sub>2</sub> O <sub>17</sub> | 681.1788 | 681.1774 | 1.4  | 2.10  |
| nl: -Coum/Gluc                                    | C <sub>23</sub> H <sub>25</sub> N <sub>2</sub> O <sub>11</sub> | 505.1461 | 505.1453 | 0.8  | 1.60  |
| nl: -Coum/Gluc/Glc                                | C <sub>17</sub> H <sub>15</sub> N <sub>2</sub> O <sub>6</sub>  | 343.0927 | 343.0925 | 0.2  | 0.70  |
| nl: -Coum/Gluc/CO <sub>2</sub> /2H                | C <sub>16</sub> H <sub>13</sub> N <sub>2</sub> O <sub>4</sub>  | 297.0872 | 297.0870 | 0.2  | 0.74  |
| <b>2,17-decarboxy-xanargentianin 12</b>           | C <sub>37</sub> H <sub>39</sub> N <sub>2</sub> O <sub>17</sub> | 783.2240 | 783.2243 | -0.3 | -0.38 |
| nl: -Coum                                         | C <sub>28</sub> H <sub>33</sub> N <sub>2</sub> O <sub>15</sub> | 637.1873 | 637.1875 | -0.2 | -0.31 |
| nl: -Coum/Gluc                                    | C <sub>22</sub> H <sub>25</sub> N <sub>2</sub> O <sub>9</sub>  | 461.1555 | 461.1555 | 0.0  | 0.00  |
| nl: -Coum/Gluc/Glc                                | C <sub>16</sub> H <sub>15</sub> N <sub>2</sub> O <sub>4</sub>  | 299.1027 | 299.1026 | 0.1  | 0.33  |
| nl: -Coum/Gluc/Glc/CO <sub>2</sub>                | C <sub>15</sub> H <sub>15</sub> N <sub>2</sub> O <sub>2</sub>  | 255.1127 | 255.1128 | -0.1 | -0.39 |
| nl: -Coum/Gluc/Glc/CO <sub>2</sub> /2H            | C <sub>15</sub> H <sub>13</sub> N <sub>2</sub> O <sub>2</sub>  | 253.0973 | 253.0971 | 0.2  | 0.79  |
| <b>2,17-bidecarboxy-xanneoargentianin 13</b>      | C <sub>37</sub> H <sub>37</sub> N <sub>2</sub> O <sub>17</sub> | 781.2090 | 781.2087 | 0.3  | 0.42  |
| nl: -Coum/Gluc                                    | C <sub>22</sub> H <sub>23</sub> N <sub>2</sub> O <sub>9</sub>  | 459.1391 | 459.1398 | -0.7 | -1.55 |

|                                                   |                                                                |          |          |      |       |
|---------------------------------------------------|----------------------------------------------------------------|----------|----------|------|-------|
| nl: -Coum/Gluc/Glc                                | C <sub>16</sub> H <sub>13</sub> N <sub>2</sub> O <sub>4</sub>  | 297.0871 | 297.0870 | 0.1  | 0.34  |
| nl: -Coum/Gluc/Glu/CO <sub>2</sub>                | C <sub>15</sub> H <sub>13</sub> N <sub>2</sub> O <sub>2</sub>  | 253.0973 | 253.0972 | 0.1  | 0.40  |
| <b>2,17-bidecarboxy-neoargentianin 14</b>         | C <sub>37</sub> H <sub>39</sub> N <sub>2</sub> O <sub>17</sub> | 783.2240 | 783.2243 | -0.3 | -0.41 |
| nl: -Coum                                         | C <sub>28</sub> H <sub>33</sub> N <sub>2</sub> O <sub>15</sub> | 637.1873 | 637.1876 | -0.2 | -0.39 |
| nl: -Coum/Gluc                                    | C <sub>22</sub> H <sub>25</sub> N <sub>2</sub> O <sub>9</sub>  | 461.1555 | 461.1555 | 0.0  | 0.09  |
| nl: -Coum/Gluc/CO <sub>2</sub>                    | C <sub>21</sub> H <sub>25</sub> N <sub>2</sub> O <sub>7</sub>  | 417.1652 | 417.1656 | -0.4 | -1.03 |
| nl: -Coum/Gluc/Glc                                | C <sub>16</sub> H <sub>15</sub> N <sub>2</sub> O <sub>4</sub>  | 299.1027 | 299.1026 | 0.1  | 0.23  |
| nl: -Coum/Gluc/Glc/CO <sub>2</sub> /2H            | C <sub>15</sub> H <sub>13</sub> N <sub>2</sub> O <sub>2</sub>  | 253.0972 | 253.0972 | 0.0  | 0.0   |
| <b>2-decarboxy-xanneoargentianin 15</b>           | C <sub>38</sub> H <sub>37</sub> N <sub>2</sub> O <sub>19</sub> | 825.1988 | 825.1985 | 0.3  | 0.36  |
| nl: -Coum                                         | C <sub>29</sub> H <sub>31</sub> N <sub>2</sub> O <sub>17</sub> | 679.1622 | 679.1617 | 0.5  | 0.74  |
| nl: -Coum/Gluc                                    | C <sub>23</sub> H <sub>23</sub> N <sub>2</sub> O <sub>11</sub> | 503.1297 | 503.1296 | 0.1  | 0.20  |
| nl: -Coum/Gluc/Glc                                | C <sub>17</sub> H <sub>13</sub> N <sub>2</sub> O <sub>6</sub>  | 341.0783 | 341.0786 | -0.3 | -0.88 |
| nl: -Coum/Gluc/Glc/CO <sub>2</sub>                | C <sub>16</sub> H <sub>13</sub> N <sub>2</sub> O <sub>4</sub>  | 297.0876 | 297.0870 | 0.6  | 2.02  |
| <i>Celosianin oxidation</i>                       |                                                                |          |          |      |       |
| <b>celosianin 17</b>                              | C <sub>40</sub> H <sub>43</sub> N <sub>2</sub> O <sub>22</sub> | 903.2306 | 903.2302 | 0.4  | 0.44  |
| nl: -Fer/Gluc                                     | C <sub>24</sub> H <sub>27</sub> N <sub>2</sub> O <sub>13</sub> | 551.1523 | 551.1508 | 1.5  | 2.72  |
| nl: -Fer/Gluc/Glc                                 | C <sub>18</sub> H <sub>17</sub> N <sub>2</sub> O <sub>8</sub>  | 389.0983 | 389.0979 | 0.4  | 1.03  |
| nl: -Fer/Gluc/Glc/CO <sub>2</sub> /2H             | C <sub>17</sub> H <sub>15</sub> N <sub>2</sub> O <sub>6</sub>  | 343.0929 | 343.0925 | 0.4  | 1.17  |
| nl: -Fer/Gluc/Glc/2CO <sub>2</sub> /4H            | C <sub>16</sub> H <sub>13</sub> N <sub>2</sub> O <sub>4</sub>  | 297.0874 | 297.0870 | 0.4  | 1.35  |
| nl: -Fer/Gluc/Glc/3CO <sub>2</sub> /4H            | C <sub>15</sub> H <sub>13</sub> N <sub>2</sub> O <sub>2</sub>  | 253.0974 | 253.0972 | 0.2  | 0.79  |
| <b>2,3-dihydroxy-2-decarboxy-xancelosianin 16</b> | C <sub>39</sub> H <sub>43</sub> N <sub>2</sub> O <sub>22</sub> | 891.2305 | 891.2302 | 0.3  | 0.34  |
| nl: - H <sub>2</sub> O                            | C <sub>39</sub> H <sub>41</sub> N <sub>2</sub> O <sub>21</sub> | 873.2192 | 873.2196 | -0.4 | -0.46 |
| nl: - H <sub>2</sub> O/CO <sub>2</sub>            | C <sub>38</sub> H <sub>41</sub> N <sub>2</sub> O <sub>19</sub> | 829.2292 | 829.2298 | -0.6 | -0.72 |
| nl: - Fer/Gluc                                    | C <sub>23</sub> H <sub>27</sub> N <sub>2</sub> O <sub>13</sub> | 539.1511 | 539.1508 | 0.3  | 0.56  |
| nl: - H <sub>2</sub> O/Fer/Gluc                   | C <sub>23</sub> H <sub>25</sub> N <sub>2</sub> O <sub>12</sub> | 521.1396 | 521.1402 | -0.6 | -1.15 |
| nl: - Fer/Gluc/Glc                                | C <sub>17</sub> H <sub>17</sub> N <sub>2</sub> O <sub>8</sub>  | 377.0978 | 377.0979 | -0.1 | -0.27 |
| nl: - H <sub>2</sub> O/Fer/Gluc/Glc               | C <sub>17</sub> H <sub>15</sub> N <sub>2</sub> O <sub>7</sub>  | 359.0875 | 359.0874 | 0.1  | 0.28  |
| <b>17-decarboxy-neocelosianin 18</b>              | C <sub>39</sub> H <sub>41</sub> N <sub>2</sub> O <sub>20</sub> | 857.2237 | 857.2247 | -1.0 | -1.17 |
| nl: -Fer                                          | C <sub>29</sub> H <sub>33</sub> N <sub>2</sub> O <sub>17</sub> | 681.1777 | 681.1774 | 0.3  | 0.44  |
| nl: -Fer/Gluc                                     | C <sub>23</sub> H <sub>25</sub> N <sub>2</sub> O <sub>11</sub> | 505.1457 | 505.1453 | 0.4  | 0.79  |
| nl: -Fer/Gluc/CO <sub>2</sub> /2H                 | C <sub>22</sub> H <sub>23</sub> N <sub>2</sub> O <sub>9</sub>  | 459.1414 | 459.1398 | 1.6  | 3.48  |
| nl: -Fer/Gluc/Glc                                 | C <sub>17</sub> H <sub>15</sub> N <sub>2</sub> O <sub>6</sub>  | 343.0926 | 343.0925 | 0.1  | 0.29  |
| nl: -Fer/Gluc/Glc/CO <sub>2</sub> /2H             | C <sub>16</sub> H <sub>13</sub> N <sub>2</sub> O <sub>4</sub>  | 297.0872 | 297.0870 | 0.2  | 0.67  |
| nl: -Fer/Gluc/Glc/2CO <sub>2</sub> /2H            | C <sub>15</sub> H <sub>13</sub> N <sub>2</sub> O <sub>2</sub>  | 253.0974 | 253.0972 | 0.2  | 0.79  |
| <b>2,17-bidecarboxy-xancelosianin 19</b>          | C <sub>38</sub> H <sub>41</sub> N <sub>2</sub> O <sub>18</sub> | 813.2353 | 813.2349 | 0.4  | 0.49  |
| nl: -Fer/Gluc                                     | C <sub>22</sub> H <sub>25</sub> N <sub>2</sub> O <sub>9</sub>  | 461.1556 | 461.1555 | 0.1  | 0.22  |
| nl: -Fer/Gluc/Glc                                 | C <sub>21</sub> H <sub>25</sub> N <sub>2</sub> O <sub>7</sub>  | 299.1027 | 299.1026 | 0.1  | 0.33  |
| nl: -Fer/Gluc/Glc/CO <sub>2</sub>                 | C <sub>16</sub> H <sub>15</sub> N <sub>2</sub> O <sub>4</sub>  | 255.1129 | 255.1128 | 0.1  | 0.39  |
| nl: -Fer/Gluc/Glc/CO <sub>2</sub> /2H             | C <sub>15</sub> H <sub>13</sub> N <sub>2</sub> O <sub>2</sub>  | 253.0970 | 253.0971 | -0.1 | -0.40 |
| <b>2,17-bidecarboxy-xanneocelosianin 20</b>       | C <sub>38</sub> H <sub>39</sub> N <sub>2</sub> O <sub>18</sub> | 811.2197 | 811.2192 | 0.5  | 0.62  |

|                                          |                                                                |          |          |      |       |
|------------------------------------------|----------------------------------------------------------------|----------|----------|------|-------|
| nl: -Fer/Gluc                            | C <sub>22</sub> H <sub>23</sub> N <sub>2</sub> O <sub>9</sub>  | 459.1402 | 459.1398 | 0.4  | 0.87  |
| nl: -Fer/Gluc/Glc                        | C <sub>16</sub> H <sub>13</sub> N <sub>2</sub> O <sub>4</sub>  | 297.0872 | 297.0870 | 0.2  | 0.67  |
| nl: -Fer/Gluc/Glc/CO <sub>2</sub>        | C <sub>15</sub> H <sub>13</sub> N <sub>2</sub> O <sub>2</sub>  | 253.0972 | 253.0972 | 0.0  | 0.00  |
| <b>2,17-bidecarboxy-neocelosianin 21</b> | C <sub>38</sub> H <sub>41</sub> N <sub>2</sub> O <sub>18</sub> | 813.2353 | 813.2349 | 0.4  | 0.49  |
| nl: -Fer/Gluc                            | C <sub>22</sub> H <sub>25</sub> N <sub>2</sub> O <sub>9</sub>  | 461.1554 | 461.1556 | -0.2 | -0.43 |
| nl: -Fer/Gluc/CO <sub>2</sub>            | C <sub>21</sub> H <sub>25</sub> N <sub>2</sub> O <sub>7</sub>  | 417.1651 | 417.1656 | -0.5 | -1.20 |
| nl: -Fer/Gluc/Glc                        | C <sub>16</sub> H <sub>15</sub> N <sub>2</sub> O <sub>4</sub>  | 299.1027 | 299.1026 | 0.1  | 0.33  |
| nl: -Fer/Gluc/Glc/CO <sub>2</sub> /2H    | C <sub>15</sub> H <sub>13</sub> N <sub>2</sub> O <sub>2</sub>  | 253.0973 | 253.0972 | 0.1  | 0.40  |
| <b>2-decarboxy-xanneocelosianin 22</b>   | C <sub>39</sub> H <sub>39</sub> N <sub>2</sub> O <sub>20</sub> | 855.2088 | 855.2091 | -0.3 | -0.35 |
| nl: -Fer/Gluc                            | C <sub>23</sub> H <sub>23</sub> N <sub>2</sub> O <sub>11</sub> | 503.1301 | 503.1296 | 0.5  | 0.99  |
| nl: -Fer/Gluc/CO <sub>2</sub>            | C <sub>22</sub> H <sub>23</sub> N <sub>2</sub> O <sub>9</sub>  | 459.1399 | 459.1398 | 0.1  | 0.22  |
| nl: -Fer/Gluc/Glc                        | C <sub>17</sub> H <sub>13</sub> N <sub>2</sub> O <sub>6</sub>  | 341.0769 | 341.0768 | 0.1  | 0.29  |
| nl: -Fer/Gluc/Glc/CO <sub>2</sub> /2H    | C <sub>16</sub> H <sub>11</sub> N <sub>2</sub> O <sub>4</sub>  | 295.0714 | 295.0715 | -0.1 | -0.34 |

57 <sup>a</sup> nl – neutral losses from  $[M + H]^+$ ; Gluc – glucuronosyl, Glc – glucosyl, Coum – coumaroyl, Fer – feruloyl

58



59  **$^1\text{H}$  NMR and  $^{13}\text{C}$  NMR spectra for the oxidized celosianins**

60 The structure elucidation of 2,17-dXNCel and 2-dXNCel was performed in DMSO-*d*<sub>6</sub>/TFA-*d*,  
61 while that for 17-dNCel was carried out in D<sub>2</sub>O. Due to the non-destructive effect of D<sub>2</sub>O, it  
62 was chosen as the solvent for prolong NMR measurements of 17-decarboxyneocelosianin. All  
63 spectra were acquired using an Agilent DD2 800 (18.8 T) spectrometer (Agilent Technologies,  
64 Santa Clara, CA, USA). Chemical shifts were determined relative to the internal TMS-*d*<sub>4</sub>.

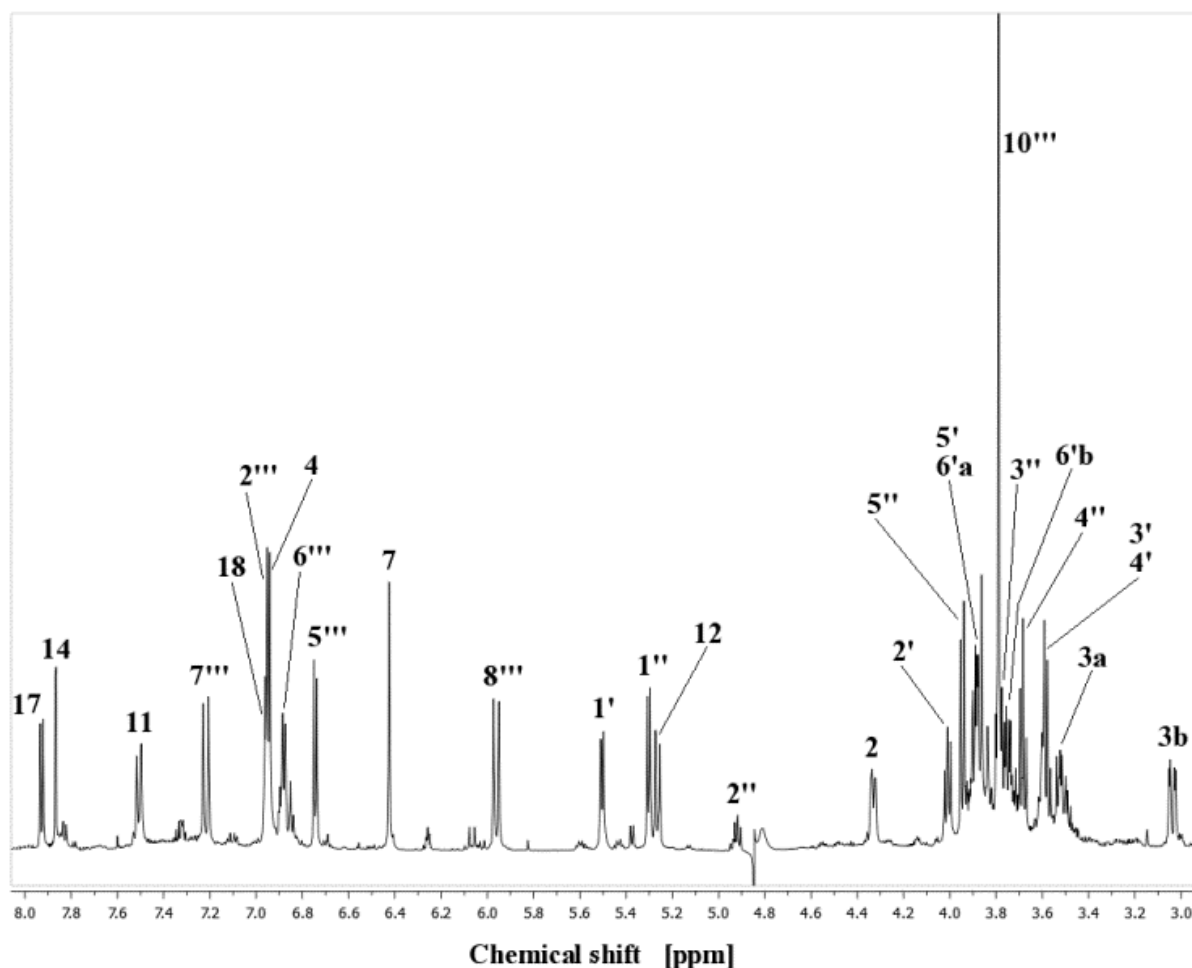

65

66 Figure S2  $^1\text{H}$  NMR spectrum of 17-decarboxyneocelosianin (D<sub>2</sub>O, 295 K).

67

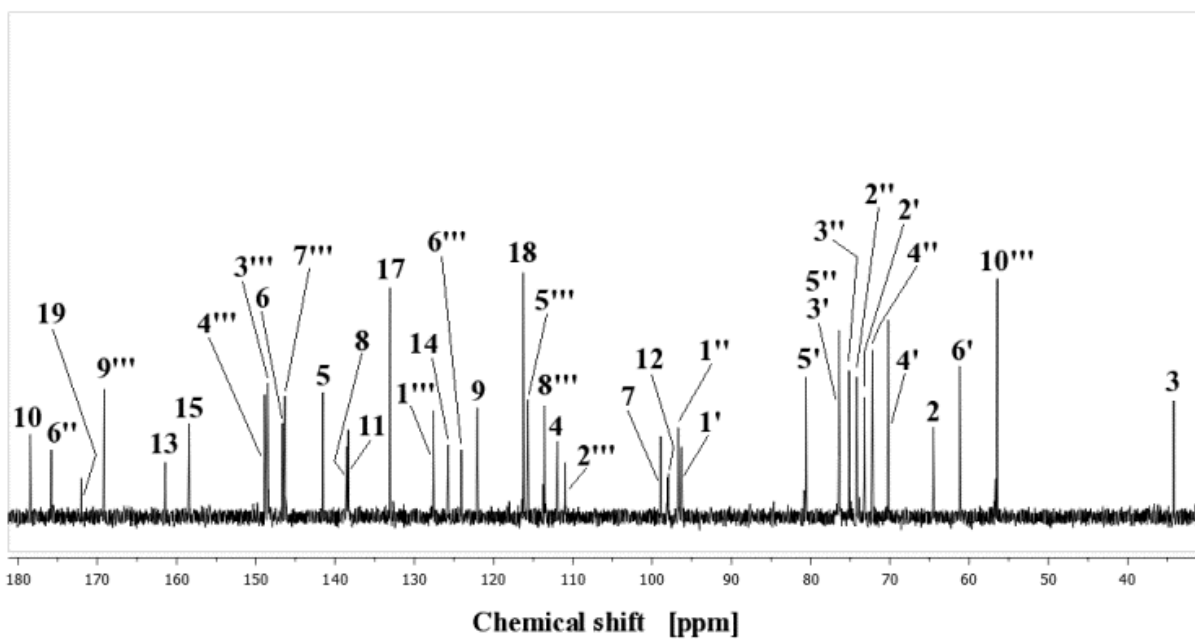

68

69 Figure S3  $^{13}\text{C}$  NMR spectrum of 17-decarboxy-neocelosianin ( $\text{D}_2\text{O}$ , 295 K).

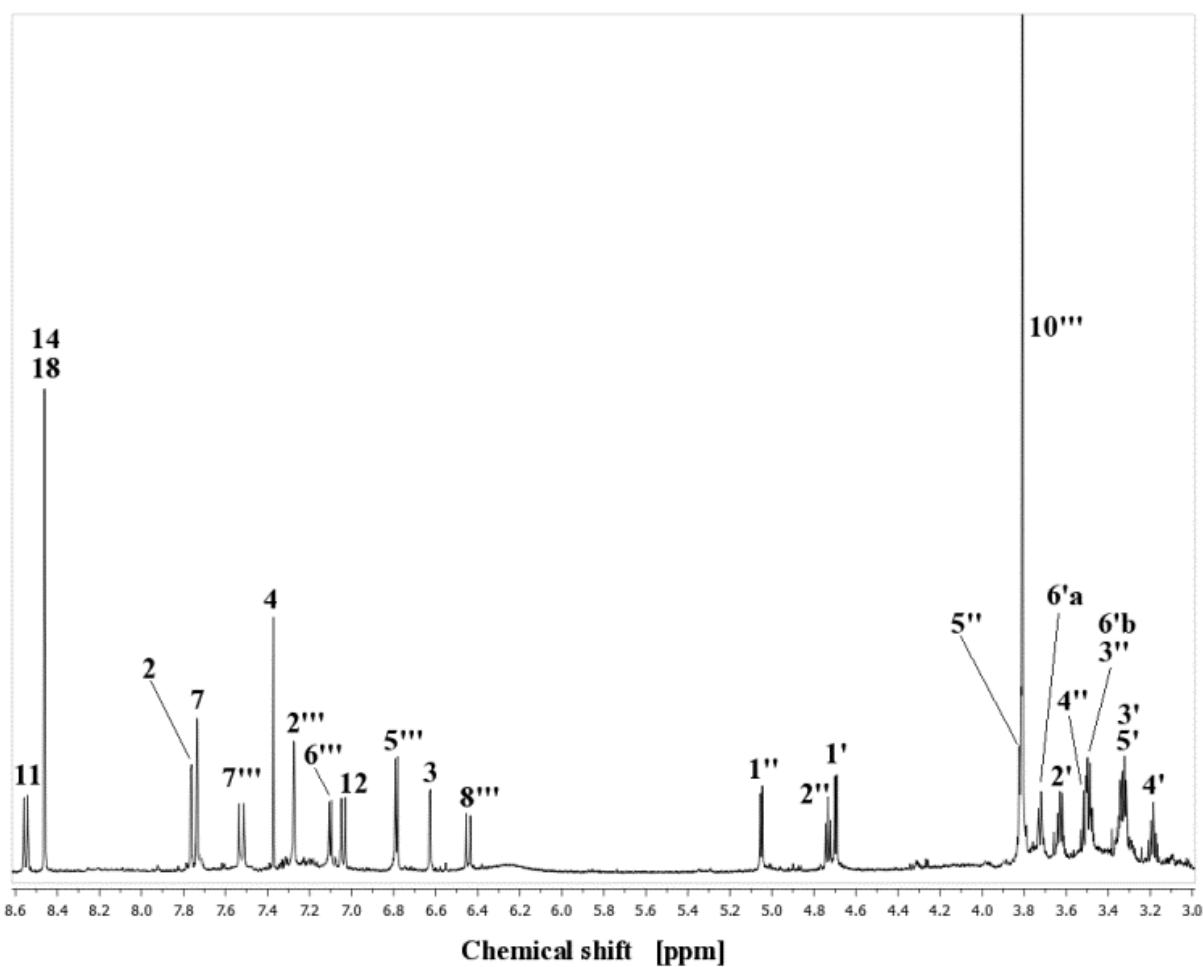

70

71 Figure S4  $^1\text{H}$  NMR spectrum of 2-decarboxy-xanneocelosianin ( $\text{d}_6\text{-DMSO/d-TFA}$ , 295 K).

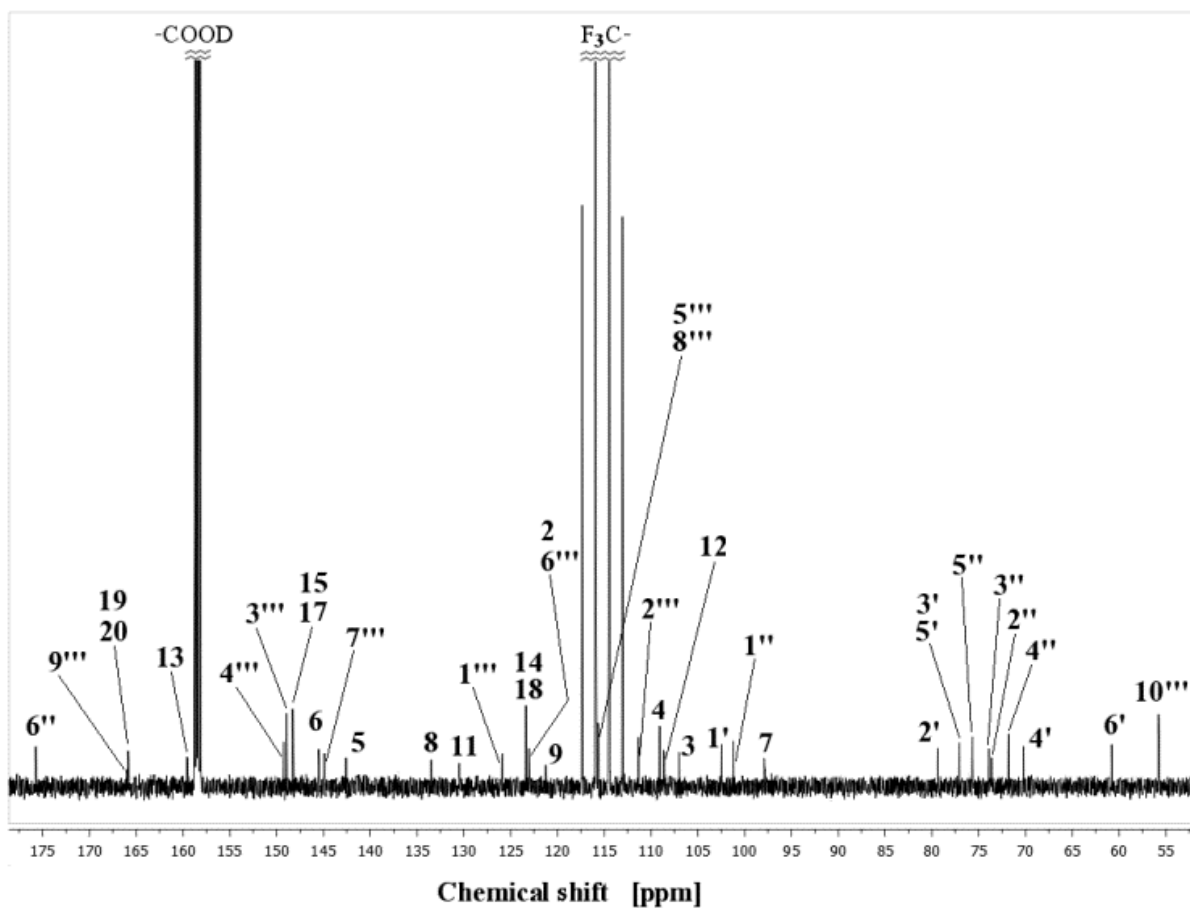

72

73 Figure S5  $^{13}\text{C}$  NMR spectrum of 2-decarboxy-xanneocelosianin ( $d_6$ -DMSO/ $d$ -TFA, 295 K).

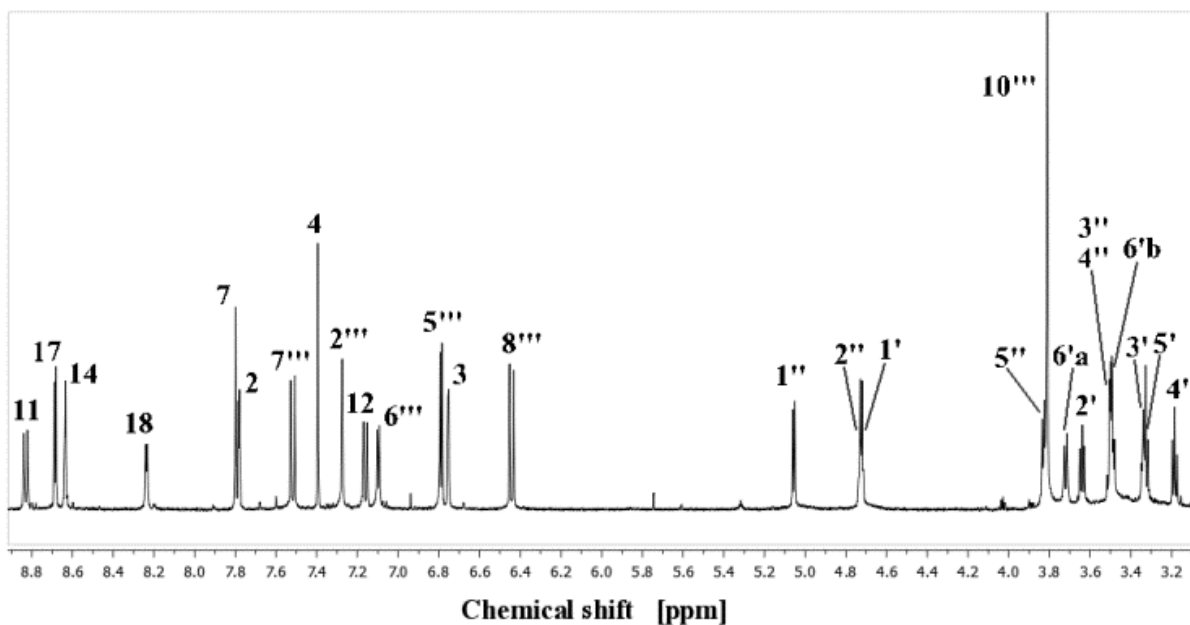

74

75 Figure S6  $^1\text{H}$  NMR spectrum of 2,17-bidecarboxy-xanneocelosianin ( $d_6$ -DMSO/ $d$ -TFA, 295  
76 K).

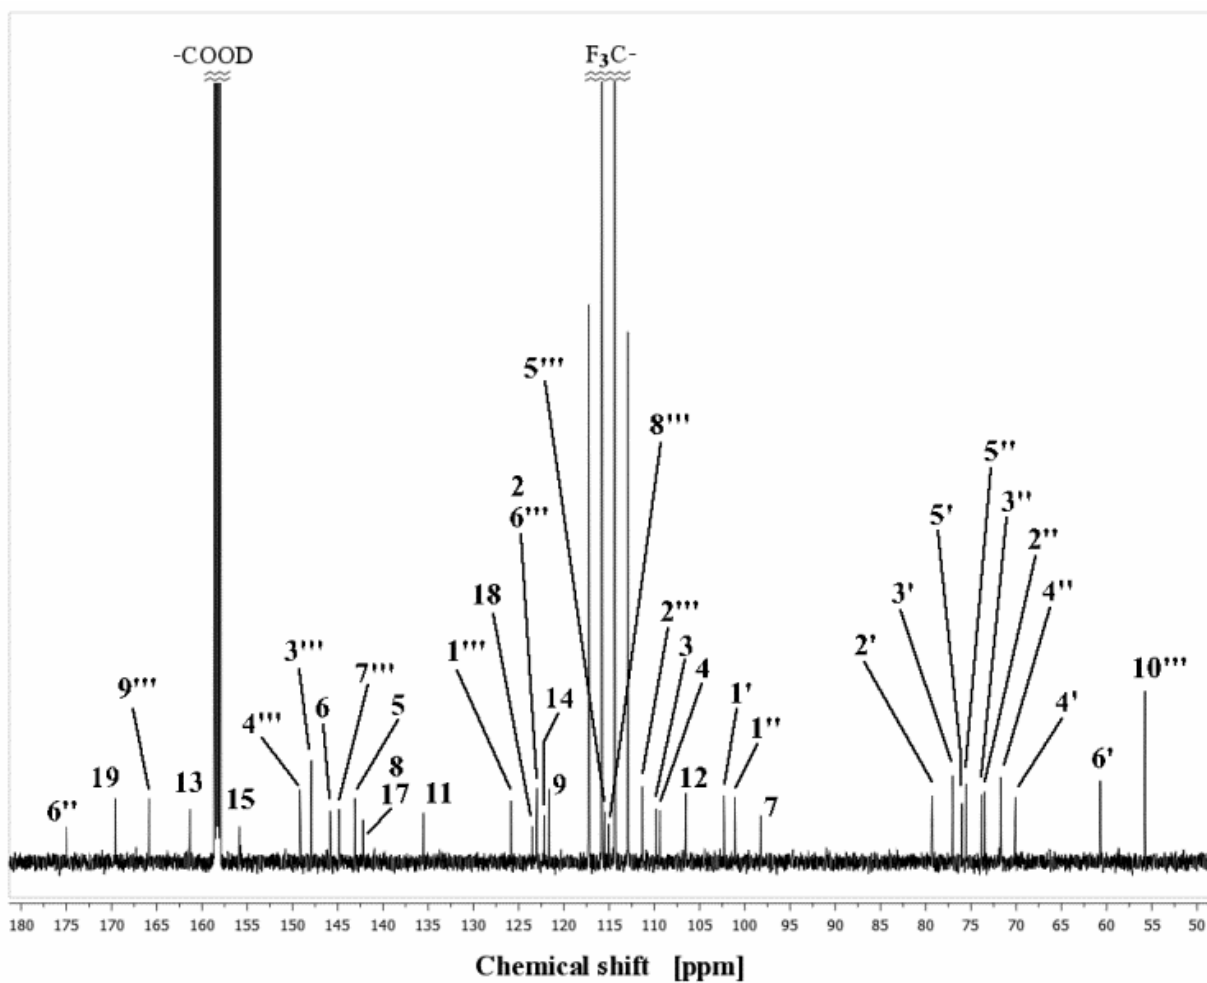

77

78 Figure S7  $^{13}\text{C}$  NMR spectrum of 2,17-bidecarboxy-xanneocelosianin (d6-DMSO/d-TFA, 295  
 79 K).

80

81 **Antioxidant activity of oxidized celosianins compared to the initial pigment**  
 82 **and reference compound gallic acid**

83 The antioxidant activity of the tested compounds was evaluated using the ABTS, FRAP, and ORAC  
 84 assays. The ABTS assay results were expressed as the IC<sub>50</sub> value (mg/L) (Figure S8, Table S2), and  
 85 the results for all assays were further expressed as milimoles of Trolox per gram of dry weight of the  
 86 sample (mmol Trolox/g DW in all assays) (Table S2).

87  
 88 Table S2 Antioxidant activity of celosianin and its oxidation products by means of the ABTS, FRAP  
 89 and ORAC assays. The results are expressed as IC<sub>50</sub> in µg/mL and TEAC values in mmol Trolox/g  
 90 DW.

| Sample      | IC <sub>50</sub><br>mg/L | TEAC <sub>ABTS</sub>     | TEAC <sub>FRAP</sub><br>mmol Trolox/g DW | TEAC <sub>ORAC</sub>     |
|-------------|--------------------------|--------------------------|------------------------------------------|--------------------------|
| Cel         | 23 <sup>c</sup> ± 1.2    | 2.4 <sup>b</sup> ± 0.062 | 2.0 <sup>b</sup> ± 0.10                  | 8.1 <sup>b</sup> ± 0.15  |
| 17-dNCel    | 34 <sup>a</sup> ± 1.4    | 1.8 <sup>c</sup> ± 0.086 | 1.0 <sup>d</sup> ± 0.051                 | 5.9 <sup>c</sup> ± 0.26  |
| 2,17-dXNCel | 29 <sup>b</sup> ± 1.3    | 2.0 <sup>c</sup> ± 0.077 | 1.2 <sup>c</sup> ± 0.058                 | 8.0 <sup>b</sup> ± 0.096 |
| GA          | 5.2 <sup>d</sup> ± 0.33  | 7.5 <sup>a</sup> ± 0.093 | 5.5 <sup>a</sup> ± 0.022                 | 11.4 <sup>a</sup> ± 0.18 |

91 Mean ± standard deviation (n=3). Different letters in columns indicate statistically significant differences (p≤0.05)  
 92 between samples according to Tuckey's test

93

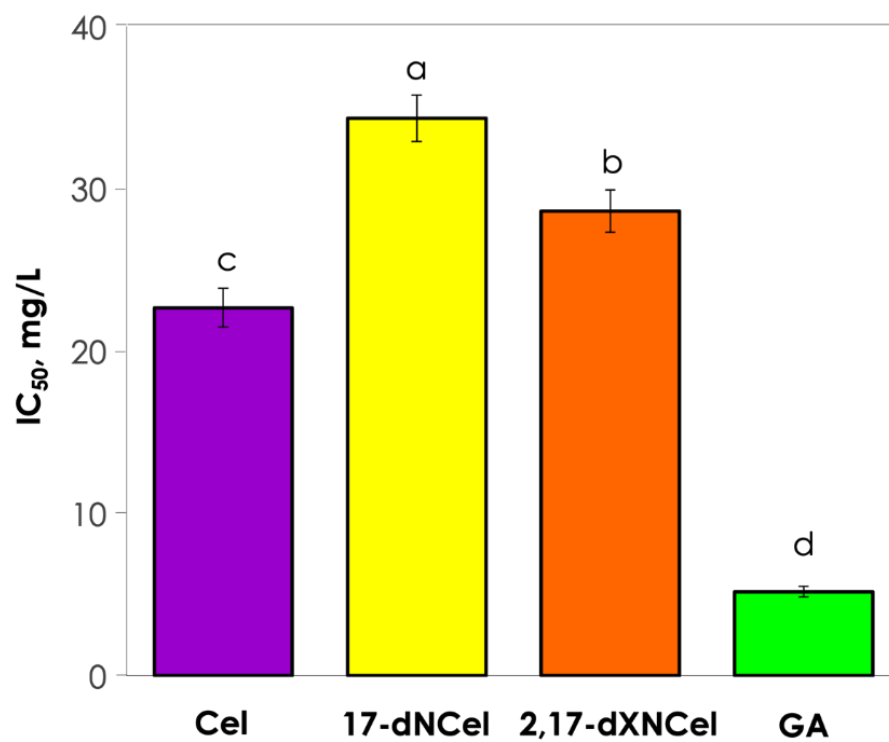

94

95 Figure S8 IC<sub>50</sub> values of celosianin **17**, and its oxidation products (17-decarboxy-neocelosianin **18**,  
96 and 2,17-bidecarboxy-xanneocelosianin **20**) as well as standard gallic acid calculated based on  
97 ABTS assay.

98

99 **Determination of H9c2 cells morphology**

100 The cell morphology of rat cardiac myoblasts (H9c2), pretreated with various concentrations of  
101 celosianin and its oxidation products, was assessed based on fluorescent live/dead imaging. The  
102 cells were imaged using a Zeiss Axiovert 40 fluorescence microscope (magnification 100x)  
103 equipped with a HXP 120C metal halide illuminator (Carl Zeiss, Germany).

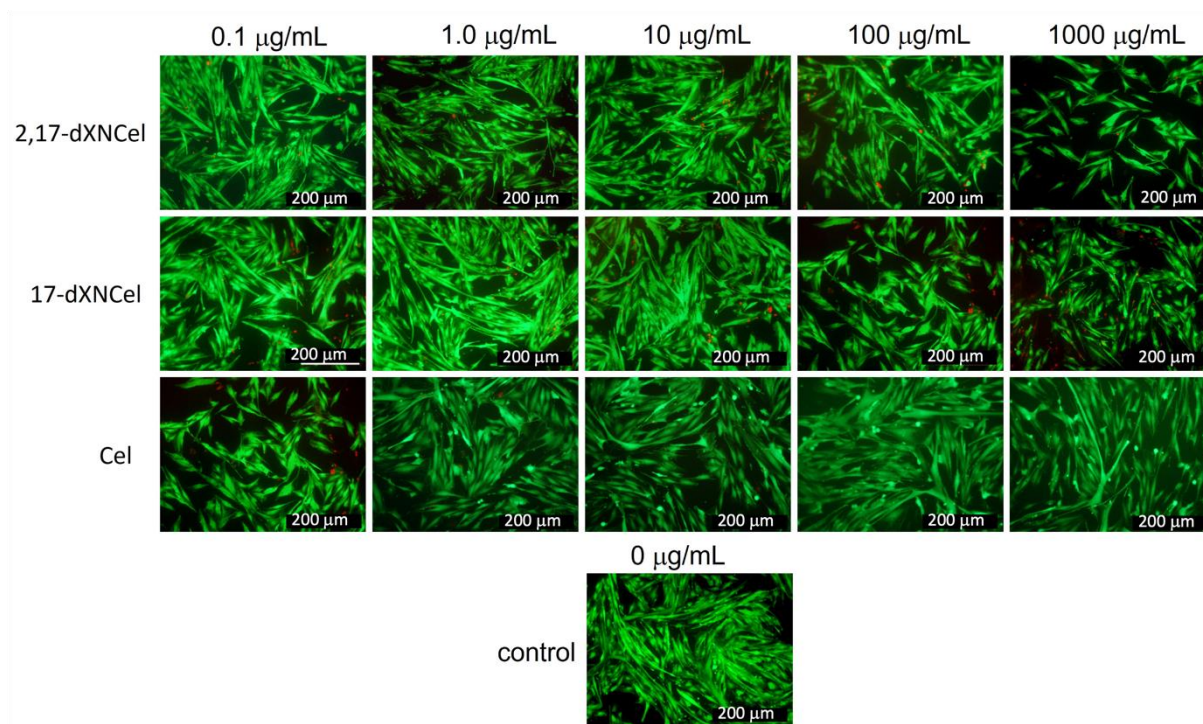

104  
105 Figure S9 Live/dead staining of H9c2 cells incubated in the presence of 2,17-dXNCel, 17-  
106 dNCel, Cel and for control without pigments. Scale bare 200 µm.
